1

2 **Subcellular niche segregation of co-obligate symbionts in whiteflies**

3

4 **Akiko Fujiwara<sup>a,b</sup>, Xian-Ying Meng<sup>c</sup>, Yoichi Kamagata<sup>c</sup>, and Tsutomu**

5 **Tsuchida<sup>d#</sup>**

6

7 <sup>a</sup>Center for Food Science and Wellness, Gunma University, Maebashi 371-8510, Japan

8 <sup>b</sup>Chemical Genomics Research Group, RIKEN Center for Sustainable Resource

9 Science, Wako, 351-0198, Japan

10 <sup>c</sup>Bioproduction Research Institute, National Institute of Advanced Industrial Science

11 and Technology, Tsukuba 305-8566, Japan

12 <sup>d</sup>Faculty of Science, Academic Assembly, University of Toyama, 3190 Gofuku,

13 Toyama City, Toyama, 930-8555, Japan

14

15 **Running title**

16 Subcellular niche segregation of the symbionts

17

18

19 #Corresponding author:

20 Tsutomu Tsuchida

21 [tsuchida@sci.u-toyama.ac.jp](mailto:tsuchida@sci.u-toyama.ac.jp)

22 +81-76-445-6553

23

24 **ORCID:**

25 Akiko Fujiwara: 0000-0001-7814-5611

26 Yoichi Kamagata: 0000-0001-7124-5812

27 Tsutomu Tsuchida: 0000-0001-6065-4469

28

29 **Abstract**

30 Many insects contain endosymbiotic bacteria within their bodies. In multiple  
31 endosymbiotic systems comprising two or more symbionts, each of the symbionts is  
32 generally localized in a different host cell or tissue. *Bemisia tabaci* (Sweet potato  
33 whitefly) possesses a unique endosymbiotic system where co-obligate symbionts are  
34 localized in the same bacteriocytes. Using fluorescence *in situ* hybridization, we found  
35 that endosymbionts in *B. tabaci* MEAM1 occupy distinct subcellular habitats, or niches,  
36 within a single bacteriocyte. *Hamiltonella* was located adjacent to the nucleus of the  
37 bacteriocyte, while *Portiera* was present in the cytoplasm surrounding *Hamiltonella*.  
38 Immunohistochemical analysis revealed that the endoplasmic reticulum separates the two  
39 symbionts. Habitat segregation was maintained for longer durations in female  
40 bacteriocytes. The same segregation was observed in three genetically distinct *B. tabaci*  
41 groups (MEAM1, MED Q1, and Asia II 6) and *Trialeurodes vaporariorum*, which shared  
42 a common ancestor with *Bemisia* over 80 million years ago, even though the coexisting  
43 symbionts and the size of bacteriocytes were different. These results suggest that the  
44 habitat segregation system existed in the common ancestor and was conserved in both  
45 lineages, despite different bacterial partners coexisting with *Portiera*. Our findings  
46 provide insights into the evolution and maintenance of complex endosymbiotic systems

47 and highlight the importance of organelles for the construction of separate niches for  
48 endosymbionts.

49

## 50 **Importance**

51 Co-obligate endosymbionts in *B. tabaci* are exceptionally localized within the  
52 same bacteriocyte (a specialized cell for endosymbiosis), but the underlying mechanism  
53 for their coexistence remains largely unknown. This study provides evidence for niche  
54 segregation at the subcellular level between the two symbionts. We showed that the  
55 endoplasmic reticulum is a physical barrier separating the two species. Despite differences  
56 in co-obligate partners, this subcellular niche segregation was conserved across various  
57 whitefly species. The physical proximity of symbionts may enable the efficient  
58 biosynthesis of essential nutrients via shared metabolic pathways. The expression “Good  
59 fences make good neighbors” appears to be true for insect endosymbiotic systems.

60

61

62 **Author contributions:** A.F. and T.T. designed research; A.F. and Y.M. performed  
63 research; Y.K. contributed new analytic tools; A.F. and T.T. analyzed data and wrote the  
64 paper.

65

## 66 **Introduction**

67 Numerous insects contain endosymbiotic bacteria within their bodies. Some  
68 endosymbionts are obligate, with crucial roles in host growth and reproduction, by  
69 providing essential nutrients, while others are facultative (1, 2). In multiple endosymbiotic  
70 systems comprising two or more symbionts, each of the symbionts is generally localized  
71 in a different host cell or tissue. This type of localization is observed in various insect  
72 species, such as aphids, spittlebugs, leafhoppers, scale insects, adelgids, psyllids, and  
73 cicadas (1, 3-13) (*Supporting data only for review* in Supplemental Information). The  
74 compartmentalization of multiple symbionts into different host cells is considered as an  
75 important step in evolution, to reduce direct conflict between the multiple symbionts and  
76 control them within the same host (12, 14).

77 The sweet potato whitefly *Bemisia tabaci* (Hemiptera: Aleyrodidae) is a cryptic  
78 species complex comprising more than 44 genetic groups based on the mitochondria  
79 cytochrome oxidase I sequences (15). Among the genetic groups, Middle East Asia Minor  
80 1 (MEAM1) and Mediterranean Q1 (MED Q1) are globally important pests, and both  
81 possess two phylogenetically distinct types of endosymbiotic bacterium, *Candidatus*  
82 *Portiera aleyrodidarum* and *Candidatus* *Hamiltonella defensa* (hereinafter called *Portiera*  
83 and *Hamiltonella*, respectively). They are co-obligate symbionts based on the virtually  
84 universal infection observed in natural populations (16-23), the decrease in host fitness  
85 caused by symbiont elimination (24, 25), and their genome contents for producing  
86 essential amino acids and cofactors (26-29), although mathematical metabolic models  
87 assuming limited conditions suggested that *Hamiltonella* shows a nutritionally parasitic  
88 state (30).

89 Interestingly, previous studies have reported that these symbionts in *B. tabaci*



90 are co-localized in the same bacteriocytes (31-33), suggesting possible competition  
91 between the symbionts for limited space and resources. Nevertheless, *Portiera* and  
92 *Hamiltonella* populations are large and exhibit synchronous dynamics in MEAM1 (34).  
93 These data suggest that some mechanism exist to maintain the two essential symbionts in  
94 the same bacteriocytes. One mechanism for avoiding conflict between the symbionts  
95 would be niche segregation, although it has never been reported at the subcellular level.  
96 In this study, we demonstrated that habitats of the symbionts are segregated within a single  
97 bacteriocyte by the endoplasmic reticulum (ER). Our results also suggest that this  
98 segregation system operates not only in specific genetic groups of *B. tabaci* but also in  
99 other whitefly species.

100

## 101 **Results and Discussion**

### 102 **Temporal dynamics of co-obligate symbionts**

103 We used quantitative polymerase chain reaction (PCR) to investigate the  
104 population dynamics of the two symbiotic bacteria *Portiera* and *Hamiltonella* in MEAM1.  
105 Both populations increased during nymphal growth, peaked in actively reproducing young  
106 adults, and declined in older whiteflies (Fig. S1). The primary role of these symbionts is  
107 to provide nutrients to the host (26-29). Consistent with that role, their population  
108 dynamics correspond to the necessity for the host growth and reproduction, as reported  
109 for other obligate symbionts of multiple insect hosts, including the pea aphid (35-37),  
110 cereal weevils (38), and a different MEAM1 strain (34). The populations of both  
111 symbionts in females were maintained at relatively higher levels for longer durations than  
112 those for the male populations (Fig. S1). These results suggest that the symbiont

113 populations are differentially regulated depending on the host's sex.

114

115 ***Portiera* and *Hamiltonella* occupy the same bacteriocytes but segregate into different**  
116 **subcellular niches**

117 Previous studies using FISH analysis (39, 40) suggested that  
118 *Hamiltonella* is distributed around the nucleus of the bacteriocyte while  
119 *Portiera* is distributed in the cytoplasmic regions. However, the distribution  
120 pattern was not clear as the observations were made on a single slice of the bacteriocyte.  
121 Therefore, we acquired 3D spatial data depicting the distribution of the two symbionts in  
122 bacteriocytes using Z stack analysis. Confocal laser scanning microscopy of the teneral  
123 adults of MEAM1 revealed distinct niche for the two symbionts within the same  
124 bacteriocytes: *Hamiltonella* was located adjacent to the nucleus of the bacteriocyte, while  
125 *Portiera* was located in the cytoplasm, surrounding *Hamiltonella* (Fig. 1A, Movie S1). In  
126 contrast, *Rickettsia*, which generally infects MEAM1 as a facultative symbiont (16, 19-  
127 23, 41, 42), were scattered all over the body and rarely observed in the bacteriocytes (Fig.  
128 S2A and B).

129 In *B. tabaci*, an intact bacteriocyte-bearing symbiont is transferred to each egg in  
130 adult females (43) that persists through embryogenesis (44). Niche segregation between  
131 *Portiera* and *Hamiltonella* was observed in the bacteriocytes transferred into the eggs (Fig.  
132 1B) of MEAM1 and was maintained from nymphs (Fig. 1C) to female and male young  
133 adults (Fig. S3A and B), during which the metabolic function of the symbionts becomes  
134 necessary for host growth and reproduction. At 15 d after adult eclosion, the observed  
135 habitat segregation was disrupted only in male bacteriocytes (Fig. S3C and D). This

136 observation was consistent with the report that apoptosis and autophagy occurred in male  
137 bacteriocytes but not in females (33). *Portiera* and *Hamiltonella* titers remarkably  
138 declined only in males at this stage (Fig. S1); hence it is conceivable that the long-term  
139 stable habitat in female bacteriocytes evolved to ensure the vertical transmission of both  
140 symbionts.

141

#### 142 **The endoplasmic reticulum segregates symbionts within bacteriocytes**

143 We performed electron microscopy to further understand the mechanisms  
144 underlying the subcellular niche segregation of symbionts in bacteriocytes. The results  
145 revealed the presence of rod-shaped bacteria next to the nucleus and unstructured  
146 hypertrophic bacteria on the outer cytoplasm (Fig. 2A). The shapes and locations of the  
147 two bacteria types were consistent with those of *Hamiltonella* and *Portiera*, as  
148 demonstrated by FISH (Fig. 1A–C). Interestingly, an ER-like multiple membrane structure  
149 was observed around *Hamiltonella* (Fig. 2B).

150 The ER and *Hamiltonella* were simultaneously detected using a combination of  
151 immunohistochemistry and FISH at the young adult stage. Strong fluorescence signals for  
152 the ER marker were detected around the nuclei of bacteriocytes and surrounded the  
153 fluorescence signals for *Hamiltonella* (Fig. 3A and Fig. S4A). A three-dimensional  
154 analysis using composite Z-stack images revealed that the ER encompassed *Hamiltonella*  
155 (Fig. 3A). These results confirmed that the ER partitioned *Hamiltonella* and *Portiera*. At  
156 15 d after adult eclosion, the ER and cell structure disruption was observed in males (Fig.  
157 S4C), possibly due to programmed cell death (33). In comparison, the ER was detected  
158 between the co-obligate symbionts in females (Fig. S4B). These results indicate that the

159 ER-mediated subcellular niche segregation of the symbionts lasts longer in females. It  
160 suggests that the ER has an important role in maintenance of stable niche for each  
161 symbiont especially in female bacteriocytes which are needed to be transferred to the next  
162 generation (44).

163

164 **Subcellular niche segregation in other *B. tabaci* subgroups and more distantly**  
165 **related species**

166 The *B. tabaci* subgroup MED Q1 also possesses *Portiera* and *Hamiltonella* as  
167 co-obligate symbionts (16-21, 26). FISH analysis indicated that *Portiera* and  
168 *Hamiltonella* are segregated within individual bacteriocytes through earlier  
169 developmental stages in MED Q1 (Fig. 1D–F), as observed in MEAM1 (Fig. 1A–C). The  
170 facultative symbiont *Cardinium* in MED Q1 did not show specific localization in  
171 bacteriocytes (Fig. S2C and D). Combining FISH and immunohistochemistry, the ER  
172 membrane encompassed *Hamiltonella* and separated it from *Portiera* (Fig. 3B and Fig.  
173 S4D). Cytological staining of the dissected living bacteriocytes from young adults also  
174 demonstrated that *Hamiltonella* was sterically surrounded by the ER and was segregated  
175 from *Portiera* (Fig. S5).

176 Furthermore, we assayed for subcellular habitat segregation in a distantly  
177 related genetic group of *B. tabaci*, Asia II 6. Asia II group is frequently infected with  
178 *Candidatus Arsenophonus* sp. (hereafter called *Arsenophonus*) in addition to *Portiera* but  
179 not with *Hamiltonella* (19, 20, 45). Using FISH, we demonstrated that *Arsenophonus* is  
180 located adjacent to the nucleus of the bacteriocyte in both adults and developing eggs (Fig.  
181 4). The localization pattern of *Arsenophonus* in Asia II 6 was identical to that of

182 *Hamiltonella* in both MEAM1 (Fig. 1A–C) and MED Q1 (Fig. 1D–F). Moreover,  
183 *Arsenophonus* around the nucleus was surrounded by the ER (Fig. S4E), similar to that of  
184 *Hamiltonella* in MEAM1 and MED Q1 (Fig. S4A, B and D).

185 *Trialeurodes vaporariorum* belongs to the same family as *B. tabaci*,  
186 *Aleyrodinae* (46). *Arsenophonus* has been detected at high frequencies in *T. vaporariorum*  
187 (22, 32, 47, 48) and is considered an essential symbiont, supplying or complementing the  
188 nutrients that are not produced by coexisting *Portiera* (49). FISH revealed that *Portiera*  
189 and *Arsenophonus* also exhibit subcellular habitat segregation in the same bacteriocytes  
190 of *T. vaporariorum* (Fig. 5A). Immunohistochemical staining with FISH indicated that the  
191 ER encloses *Arsenophonus*, separating it from *Portiera* (Fig. 5B and Fig. S4F).  
192 Bacteriocytes in *T. vaporariorum* (ca. 20 µm in diameter) are considerably smaller than  
193 those of *B. tabaci* (ca. 30 to 50 µm). Despite the morphological and phylogenetic  
194 differences, the same system in bacteriocytes is involved in symbiont niche partitioning.  
195 This suggests that the subcellular niche segregation of the symbionts evolved in the  
196 common ancestor and have been conserved to the present.

197

### 198 **Biological implications, evolution, and possible mechanisms underlying subcellular** 199 **symbiont segregation**

200 Previous ecological studies have shown that niche segregation reduces the  
201 strength of competition between species that exploit the same limiting resource (50-52).  
202 Niche segregation is found in various taxa, including endosymbiotic bacteria in insects, in  
203 which each endosymbiont generally localizes in different host cells or organs (1, 3-12).  
204 The compartmentalization of multiple symbionts into different host cells is considered as

205 an important step in the evolution to reduce direct conflict between the multiple symbionts  
206 and control them within the same host (14). The endosymbiotic system in *B. tabaci* is a  
207 rare exception because co-obligate symbionts occupy the same bacteriocytes (31, 32). In  
208 this study, we revealed that the endosymbionts in *B. tabaci* and *T. vaporariorum* are  
209 separated by the ER and show niche segregation at the subcellular level. This novel  
210 finding indicates that the niche segregation of endosymbionts can be established not only  
211 in different host cells but also within a single cell.

212           It is intriguing why the symbiont co-habitation has evolved exceptionally in the  
213 whiteflies. In certain whitefly species, including *B. tabaci* and *T. vaporariorum*, one or  
214 more entire bacteriocytes bearing symbionts are transferred to the developing egg (1, 43,  
215 44, 53). Under the unique transmission manner, one of the symbiont partners could be lost  
216 by the failure of transmission if the two co-obligate symbiotic bacteria were separated into  
217 different cells. Hence, it is conceivable that the unique transmission machinery of the  
218 symbionts has driven the evolution of the symbiont co-localization in whiteflies. To  
219 clarify the evolutionary process of co-habitation and subcellular niche segregation of the  
220 symbionts, further studies are required on the vertical transmission and localization  
221 manners of the symbionts in various whitefly species.

222           In some co-obligate symbiotic systems in insects, each symbiont can complete  
223 the biosynthetic pathway of some essential nutrients, such as essential amino acids or  
224 vitamins, on its own or with host genes (13, 54-58). In other co-symbiotic systems,  
225 metabolic interdependence for some essential nutrients is present, wherein one of the  
226 symbionts possesses genes necessary for the first part of the biosynthetic pathway, and the  
227 other symbiont has genes necessary for the latter part of the pathway (10, 12, 13, 59-60).  
228 In such a system, metabolic intermediates must diffuse or be translocated from one

229 symbiont to another to produce essential nutrients in adjacent host cells. However, the co-  
230 obligate symbiotic system in *B. tabaci* has a more complex interdependence; enzymes for  
231 essential amino acids (e.g., lysine) are dispersed across both *Portiera* and *Hamiltonella*,  
232 and metabolic intermediates should be transported between the symbionts multiple times  
233 for production (26-28) (Fig. S6A). Although several metabolic duplications are present in  
234 the host genome (27, 28, 61), the physical proximity between *Portiera* and *Hamiltonella*  
235 in the same bacteriocyte, which is stably maintained during development (Fig. 1), may be  
236 adaptive for the efficient production of essential amino acids using intertwined  
237 biosynthetic pathways (Fig. S6C). It should be noted that mealybugs also have intertwined  
238 metabolic pathways in their co-obligate symbiotic systems; gamma-proteobacteria are  
239 located inside the beta-proteobacterium *Tremblaya*, and metabolic intermediates are  
240 transported between them multiple times to produce nutrients (62-65). Accordingly,  
241 reducing the distance between symbionts could be a driving force for the evolution of  
242 complex interdependent biosynthetic pathways.

243 *B. tabaci* is a cryptic species complex with reportedly more than 44 genetic  
244 groups (15). In this study, we found the subcellular habitat segregation of two symbionts  
245 in three distinct genetic groups in *B. tabaci*, MEAM1, MED Q1, and Asia II 6 (Fig. 1, 4  
246 and Fig. S4A-E). Moreover, the same localization pattern of symbionts was detected in *T.*  
247 *vaporariorum* (Fig. 5 and Fig. S4F) belonging to the different genera. In Asia II 6 and *T.*  
248 *vaporariorum*, the subcellular niche occupied by *Hamiltonella* in MEAM1 and MED Q1  
249 was occupied by *Arsenophonus*. Similar to *Hamiltonella* in *B. tabaci*, it has been  
250 suggested that *Arsenophonus* shares metabolic pathways for essential amino-acid  
251 synthesis with *Portiera* and the host *T. vaporariorum* (Fig. S6B) (49, 66). *Arsenophonus*  
252 might establish co-obligate symbiotic systems with *Portiera* in Asia II 6 as well as in *T.*

253 *vaporariorum*. In many geographic regions, *Hamiltonella* and *Arsenophonus* are rarely  
254 found in the same individual of *B. tabaci* and *T. vaporariorum* (16-23, 67), suggesting  
255 that the two symbiotic bacteria are competing over functional and cytological niches.  
256 Moreover, it appears that the habitat segregation system was established in a common  
257 ancestor of species in *Aleyrodinae* and was conserved, while the bacterial partners  
258 coexisting with *Portiera* have been replaced (Fig. 6). To understand the generality and the  
259 evolutionary origin of the habitat segregation system, detailed analyses of other genetic  
260 groups in *B. tabaci* and diverse whitefly species are required.

261 As mentioned above, the bacterial partner coexisting with *Portiera* in  
262 bacteriocytes varied depending on the species and groups of host insects. This indicates  
263 that some molecular and cellular mechanisms underlying subcellular habitat segregation  
264 are mainly attributed to the host insects. It is also possible that the symbionts in whiteflies  
265 have some properties associated with the ER in bacteriocytes. It is noteworthy that human  
266 pathogenic bacteria, such as *Legionella pneumophila*, *Brucella abortus*, and *Simkania*  
267 *negevensis*, exploit the host ER to generate a niche for replication (68-71). Recent studies  
268 have revealed that the organelles have an intimate association with endosymbiotic bacteria  
269 and play key roles in the maintenance and control of the endosymbiotic system in insects  
270 (72-76). This study provides novel insight into the interaction between symbionts and  
271 organelles. To clarify the molecular mechanisms underlying subcellular niche segregation,  
272 further studies are required from the perspectives of both the host and the symbionts.  
273 Super-resolution microscopy and cryo-electron microscopy will be useful in revealing  
274 details about the sites of interaction between the symbionts and ER and inferring  
275 molecular mechanisms.

276



277

## 278 **Materials and methods**

279

280 **Materials.** Whitefly strains and their symbionts used in the study are listed in Table S1.  
281 *Bemisia tabaci* was maintained on cabbage (*Brassica oleracea*) and *Trialeurodes*  
282 *vaporariorum* on cucumber (*Cucumis sativus*) at  $25 \pm 1^\circ\text{C}$  and 40–60% relative humidity  
283 in a long-day regimen (16L: 8D). Adult *B. tabaci* Asia II 6 insects were collected from  
284 the field in May 2017 and immediately stored in 100% acetone until use (77). Additional  
285 detailed information is provided in Table S1 and Fig. S7.

286

287 **DNA extraction and quantitative PCR analysis of symbionts.** Ten individuals of  
288 MEAM1 at each developmental stage (Fig. S7), from egg to adult, were collected. Eggs  
289 and nymphs were collected without distinction between males and females as the sex of  
290 whiteflies is indistinguishable at immature stages. In the adult stages, whiteflies from both  
291 sexes were separately collected. Samples were preserved in 100% acetone (77) until DNA  
292 extraction. The total genomic DNA of the insect individual and its symbionts was  
293 extracted using the NucleoSpin Tissue XS Kit (MACHEREY-NAGEL, Duren, Germany),  
294 according to the manufacturer's instructions. From the eggs, the DNA was extracted from  
295 groups of 10 individuals. *Portiera* and *Hamiltonella* were quantified in terms of 16S  
296 ribosomal RNA gene copies using the Mx3005P system (Agilent Technologies, Santa  
297 Clara, CA, USA) with THUNDERBIRD SYBR qPCR Mix (Toyobo, Osaka, Japan), and  
298 specific primer sets (Table S2). PCR conditions were:  $95^\circ\text{C}$  for 3 min, followed by 40  
299 cycles of  $95^\circ\text{C}$  for 30 s and  $55^\circ\text{C}$  for 30 s, and a final extension at  $72^\circ\text{C}$  for 30 s. The

300 quantitative PCR analysis was conducted by using a standard curve method, as described  
301 previously (78).

302

303 **Fluorescence *in situ* hybridization (FISH).** To examine the localization of the symbionts,  
304 the insect whole-body or dissected tissue specimens were fixed in Carnoy's solution  
305 (EtOH: chloroform: glacial acetic acid, 6:3:1), bleached in 6% hydrogen peroxide in EtOH,  
306 and subjected to whole-mount FISH, as described (79). Fluorochrome-labelled  
307 oligonucleotide probes are listed in Table S2. Host-cell nuclei were counterstained with  
308 4,6-diamino-2-phenylindole (DAPI). The specificity of *in situ* hybridization was  
309 confirmed using a no-probe control and an RNase digestion control (78).

310

311 **Transmission electron microscopy.** Twenty teneral adults of MEAM1 (1 d old after  
312 eclosion) were dissected in 2.5% glutaraldehyde in 0.1 M phosphate buffer (pH 7.4), and  
313 the dissected bacteriocytes were pre-fixed with the fixative at 4°C overnight.  
314 Subsequently, the samples were post-fixed with 2% osmium tetroxide in 0.1 M phosphate  
315 buffer (pH 7.4) at 4°C for 90 min before dehydration with a graded ethanol series. The  
316 dehydrated specimens were embedded in EPON 812 resin, processed into ultrathin  
317 sections (approximately 80 nm thick) using an ultramicrotome EM UC7 (Leica, Wetzlar,  
318 Germany), mounted on copper meshes, stained with uranyl acetate and lead citrate, and  
319 observed under a transmission electron microscope (80kV; H-7600 Hitachi, Tokyo,  
320 Japan).

321

322 **Simultaneous detection of symbionts and endoplasmic reticulum.** Ten to twenty

323 mixed-sex individuals of 1–5 d or 15 d after adult eclosion were collected from the  
324 laboratory strains, *B. tabaci* MEAM1 and MED Q1 and *T. vaporariorum* (Table S1). For  
325 *B. tabaci* Asia II 6, acetone-preserved samples were used owing to the difficulty of  
326 obtaining fresh materials. After samples were washed with 70% EtOH, bacteriocytes were  
327 collected by dissection in phosphate-buffered saline (PBS). The bacteriocytes were  
328 transferred to 6.5-mm Transwell dishes with 8- $\mu$ m pore polycarbonate membrane inserts  
329 (Corning, New York, NY, USA) and fixed in 4% paraformaldehyde (PFA in phosphate  
330 buffer) for 3 h at 25°C. After fixation, bacteriocytes were washed thrice in PBS with 0.3%  
331 TritonX-100 (PBSTx) for 30 min and then soaked thrice in hybridization solution (20 mM  
332 Tris-HCl pH 8.0, 0.9 M NaCl, 0.01% SDS and 30% formamide) for 5 min. Then,  
333 fluorochrome-labeled probes were hybridized overnight at 25°C. The oligonucleotide  
334 probes (Table S2) were used for *Portiera* detection. For *Hamiltonella* or *Arsenophonus*  
335 detection, Stellaris RNA FISH probe sets were used (Biosearch Technologies, Novato,  
336 CA, USA) (Table S2) as previously described (80). Host-cell nuclei were counterstained  
337 with DAPI during hybridization. Subsequently, the samples were refixed in 4% PFA for  
338 7 h at 4°C as described (81) with minor modifications. Then, bacteriocytes were washed  
339 thrice in PBSTx and blocked with 1% gelatin in PBS for 30 min at 25°C. After blocking,  
340 bacteriocytes were incubated with the KDEL ER marker antibody (10C3) (Santa Cruz,  
341 Dallas, TX, USA; cat. no. sc-58774) diluted (1:50) in PBS containing 1% gelatin and  
342 0.05% Tween 20 overnight at 4°C. Bacteriocytes were washed thrice in PBSTx and then  
343 incubated with Alexa Fluor Plus 555- or 647-conjugated goat anti-mouse IgG secondary  
344 antibody (Thermo Fisher Scientific, Waltham, MA, USA) at a dilution of 1:100 for 3 h at  
345 25°C.  
346

347 **Laser confocal microscopy.** Samples were mounted with ProLong Diamond (Thermo  
348 Fisher Scientific). Images were obtained using a LSM5 Pascal or LSM710 microscope  
349 and analyzed using LSM5 Pascal Image and LSM ZEN2009 software (Carl Zeiss,  
350 Oberkochen, Germany).

351

352 **Cytological staining.** Staining bacteriocytes was performed as described previously (82),  
353 with some modifications. Bacteriocytes were dissected from female *B. tabaci* MED Q1  
354 (Table S1) within 3 d after adult eclosion in Buffer A (35 mM Tris-HCl, pH 7.6,  
355 containing 10 mM MgCl<sub>2</sub>, 25 mM KCl, and 250 mM sucrose) and stained with 4 μM  
356 SYTO16 (Thermo Fisher Scientific, Waltham, MA, USA) for nucleic acids (bacteria and  
357 host) and 4 μM ER-Tracker Red (Thermo Fisher Scientific) for ER in Buffer A for 2 h at  
358 37°C on the SkyLight Glass Base Dish 3971-035-SK (IWAKI, Shizuoka, Japan). Images  
359 were obtained using a laser confocal microscope (LSM710) and analyzed using the LSM  
360 software ZEN2009 (Carl Zeiss, Oberkochen, Germany).

361

362 **Statistics.** To evaluate differences in the symbiont titers between females and males at  
363 each adult stage (days 1, 15 and 30), the Mann-Whitney U test with Bonferroni's  
364 correction was adopted. Analyses were conducted with R v.3.5.3 software ([http://www.r-](http://www.r-project.org)  
365 [project.org](http://www.r-project.org)).

366

367

368

369 **Acknowledgements**

370 We thank Y. Horita, D. Hwang, K. Moronaga, N. Murakami, Y. Utsuno, and M. Watanabe  
371 for technical assistance; N. Haruyama, K. Kijima, T. Kitamura, J. Ohnishi, I. Ohta, and T.  
372 Uesato for providing insect samples; and S. Egoshi, K. Dodo and M. Yoshida for useful  
373 comments. Part of this study was supported by JSPS KAKENHI Grant Number 18K05673  
374 (to T.T.) and grants from the Project of the NARO Bio-oriented Technology Research  
375 Advancement Institution (Research program on the development of innovative  
376 technology). A.F. was supported by grants from the RIKEN Special Postdoctoral  
377 Researcher (SPDR) Program and Leading Initiative for Excellent Young Researchers  
378 (LEADER) Program.

379

380

381

## 382 **References**

- 383 1. Buchner P. 1965. Endosymbiosis of animals with plant microorganisms. 909 pp.  
384 John Wiley and Sons, New York, NY.
- 385 2. Moran NA, McCutcheon JP, Nakabachi A. 2008. Genomics and evolution of  
386 heritable bacterial symbionts. *Annu Rev Genet* 42:165-190.
- 387 3. Koga R, Bennett GM, Cryan JR, Moran NA. 2013. Evolutionary replacement of  
388 obligate symbionts in an ancient and diverse insect lineage. *Environ Microbiol*  
389 15:2073-2081.
- 390 4. Noda H, Watanabe K, Kawai S, Yukuhiro F, Miyoshi T, Tomizawa M, Koizumi  
391 Y, Nikoh N, Fukatsu T. 2012. Bacteriome-associated endosymbionts of the green  
392 rice leafhopper *Nephotettix cincticeps* (Hemiptera: Cicadellidae). *Appl Entomol*

- 393 Zool 47:217-225.
- 394 5. Tsuchida T, Koga R, Horikawa M, Tsunoda T, Maoka T, Matsumoto S, Simon JC,  
395 Fukatsu T. 2010. Symbiotic bacterium modifies aphid body color. Science  
396 330:1102-1104.
- 397 6. Matsuura Y, Koga R, Nikoh N, Meng XY, Hanada S, Fukatsu T. 2009. Huge  
398 symbiotic organs in giant scale insects of the genus *Drosicha* (Coccoidea:  
399 Monophlebidae) harbor flavobacterial and enterobacterial endosymbionts. Zoolog  
400 Sci 26:448-456.
- 401 7. Nakabachi A, Ueoka R, Oshima K, Teta R, Mangoni A, Gurgui M, Oldham NJ,  
402 van Echten-Deckert G, Okamura K, Yamamoto K, Inoue H, Ohkuma M, Hongoh  
403 Y, Miyagishima SY, Hattori M, Piel J, Fukatsu T. 2013. Defensive bacteriome  
404 symbiont with a drastically reduced genome. Curr Biol 23:1478-1484.
- 405 8. Manzano-Marin A, Szabo G, Simon JC, Horn M, Latorre A. 2017. Happens in the  
406 best of subfamilies: establishment and repeated replacements of co-obligate  
407 secondary endosymbionts within Lachninae aphids. Environ Microbiol 19:393-  
408 408.
- 409 9. Matsuura Y, Moriyama M, Lukasik P, Vanderpool D, Tanahashi M, Meng XY,  
410 McCutcheon JP, Fukatsu T. 2018. Recurrent symbiont recruitment from fungal  
411 parasites in cicadas. Proc Natl Acad Sci U S A 115:E5970-E5979.
- 412 10. Manzano-Marin A, Simon JC, Latorre A. 2016. Reinventing the Wheel and  
413 Making It Round Again: Evolutionary Convergence in *Buchnera-Serratia*  
414 Symbiotic Consortia between the Distantly Related Lachninae Aphids  
415 *Tuberolachnus salignus* and *Cinara cedri*. Genome Biol Evol 8:1440-1458.
- 416 11. Toenshoff ER, Penz T, Narzt T, Collingro A, Schmitz-Esser S, Pfeiffer S, Klepal

- 417 W, Wagner M, Weinmaier T, Rattei T, Horn M. 2012. Bacteriocyte-associated  
418 gammaproteobacterial symbionts of the *Adelges nordmannianae/piceae* complex  
419 (Hemiptera: Adelgidae). ISME J 6:384-396.
- 420 12. Monnin D, Jackson R, Kiers ET, Bunker M, Ellers J, Henry LM. 2020. Parallel  
421 evolution in the integration of a co-obligate aphid symbiosis. Curr Biol 30:1949-  
422 1957 e6.
- 423 13. Renoz F, Ambroise J, Bearzatto B, Fakhour S, Parisot N, Ribeiro Lopes M, Gala  
424 JL, Calevro F, Hance T. 2022. The di-symbiotic systems in the aphids *Sipha*  
425 *maydis* and *Periphyllus lyropictus* provide a contrasting picture of recent co-  
426 obligate nutritional endosymbiosis in aphids. Microorganisms 10:1360.
- 427 14. Chomicki G, Werner GDA, West SA, Kiers ET. 2020. Compartmentalization drives  
428 the evolution of symbiotic cooperation. Philos Trans R Soc Lond B Biol Sci  
429 375:20190602.
- 430 15. Kanakala S, Ghanim M. 2019. Global genetic diversity and geographical  
431 distribution of *Bemisia tabaci* and its bacterial endosymbionts. PLoS One  
432 14:e0213946.
- 433 16. Gueguen G, Vavre F, Gnankine O, Peterschmitt M, Charif D, Chiel E, Gottlieb Y,  
434 Ghanim M, Zchori-Fein E, Fleury F. 2010. Endosymbiont metacommunities,  
435 mtDNA diversity and the evolution of the *Bemisia tabaci* (Hemiptera:  
436 Aleyrodidae) species complex. Mol Ecol 19:4365-4376.
- 437 17. Tsagkarakou A, Mouton L, Kristoffersen JB, Dokianakis E, Grispou M, Bourtzis  
438 K. 2012. Population genetic structure and secondary endosymbionts of Q *Bemisia*  
439 *tabaci* (Hemiptera: Aleyrodidae) from Greece. Bull Entomol Res 102:353-365.
- 440 18. GnankinÉ O, Mouton L, Henri H, Terraz G, HoundetÉ T, Martin T, Vavre F,

- 441 Fleury F. 2013. Distribution of *Bemisia tabaci* (Homoptera: Aleyrodidae) biotypes  
442 and their associated symbiotic bacteria on host plants in West Africa. *Insect*  
443 *Conservation and Diversity* 6:411-421.
- 444 19. Bing XL, Ruan YM, Rao Q, Wang XW, Liu SS. 2013. Diversity of secondary  
445 endosymbionts among different putative species of the whitefly *Bemisia tabaci*.  
446 *Insect Sci* 20:194-206.
- 447 20. Fujiwara A, Maekawa K, Tsuchida T. 2015. Genetic groups and endosymbiotic  
448 microbiota of the *Bemisia tabaci* species complex in Japanese agricultural sites. *J*  
449 *Appl Entomol* 139:55–66.
- 450 21. Zchori-Fein E, Lahav T, Freilich S. 2014. Variations in the identity and complexity  
451 of endosymbiont combinations in whitefly hosts. *Front Microbiol* 5:310.
- 452 22. Marubayashi JM, Kliot A, Yuki VA, Rezende JA, Krause-Sakate R, Pavan MA,  
453 Ghanim M. 2014. Diversity and localization of bacterial endosymbionts from  
454 whitefly species collected in Brazil. *PLoS One* 9:e108363.
- 455 23. Karut K, Karaca MM, Döker I, Kazak C. 2017. Analysis of Species, Subgroups,  
456 and Endosymbionts of *Bemisia tabaci* (Hemiptera: Aleyrodidae) From  
457 Southwestern Cotton Fields in Turkey. *Environ Entomol* 46:1035-1040.
- 458 24. Su Q, Oliver KM, Pan H, Jiao X, Liu B, Xie W, Wang S, Wu Q, Xu B, White JA,  
459 Zhou X, Zhang Y. 2013. Facultative symbiont *Hamiltonella* confers benefits to  
460 *Bemisia tabaci* (Hemiptera: Aleyrodidae), an invasive agricultural pest worldwide.  
461 *Environ Entomol* 42:1265-71.
- 462 25. Su Q, Xie W, Wang S, Wu Q, Liu B, Fang Y, Xu B, Zhang Y. 2014. The  
463 endosymbiont *Hamiltonella* increases the growth rate of its host *Bemisia tabaci*  
464 during periods of nutritional stress. *PLoS One* 9: e89002.



- 465 26. Rao Q, Rollat-Farnier PA, Zhu DT, Santos-Garcia D, Silva FJ, Moya A, Latorre  
466 A, Klein CC, Vavre F, Sagot MF, Liu SS, Mouton L, Wang XW. 2015. Genome  
467 reduction and potential metabolic complementation of the dual endosymbionts in  
468 the whitefly *Bemisia tabaci*. *BMC Genomics* 16:226.
- 469 27. Chen W, Hasegawa DK, Kaur N, Kliot A, Pinheiro PV, Luan J, Stensmyr MC,  
470 Zheng Y, Liu W, Sun H, Xu Y, Luo Y, Kruse A, Yang X, Kontsedalov S, Lebedev  
471 G, Fisher TW, Nelson DR, Hunter WB, Brown JK, Jander G, Cilia M, Douglas  
472 AE, Ghanim M, Simmons AM, Wintermantel WM, Ling KS, Fei Z. 2016. The  
473 draft genome of whitefly *Bemisia tabaci* MEAM1, a global crop pest, provides  
474 novel insights into virus transmission, host adaptation, and insecticide resistance.  
475 *BMC Biol* 14:110.
- 476 28. Xie W, Yang X, Chen C, Yang Z, Guo L, Wang D, Huang J, Zhang H, Wen Y,  
477 Zhao J, Wu Q, Wang S, Coates BS, Zhou X, Zhang Y. 2018. The invasive MED/Q  
478 *Bemisia tabaci* genome: a tale of gene loss and gene gain. *BMC Genomics* 19:68.
- 479 29. Wang YB, Ren FR, Yao YL, Sun X, Walling LL, Li NN, Bai B, Bao XY, Xu XR,  
480 Luan JB. 2020. Intracellular symbionts drive sex ratio in the whitefly by  
481 facilitating fertilization and provisioning of B vitamins. *ISME J* 14:2923-2935.
- 482 30. Ankrah NYD, Luan J, Douglas AE. 2017. Cooperative Metabolism in a Three-  
483 Partner Insect-Bacterial Symbiosis Revealed by Metabolic Modeling. *J Bacteriol*  
484 199.
- 485 31. Gottlieb Y, Ghanim M, Gueguen G, Kontsedalov S, Vavre F, Fleury F, Zchori-  
486 Fein E. 2008. Inherited intracellular ecosystem: symbiotic bacteria share  
487 bacteriocytes in whiteflies. *FASEB J* 22:2591-2599.
- 488 32. Skaljac M, Zanic K, Ban SG, Kontsedalov S, Ghanim M. 2010. Co-infection and

- 489            localization of secondary symbionts in two whitefly species. BMC Microbiology  
490            10:142.
- 491    33.    Li NN, Jiang S, Lu KY, Hong JS, Wang YB, Yan JY, Luan JB. 2022. Bacteriocyte  
492            development is sexually differentiated in *Bemisia tabaci*. Cell Rep 38:110455.
- 493    34.    Su Q, Xie W, Wang S, Wu Q, Ghanim M, Zhang Y. 2014. Location of symbionts  
494            in the whitefly *Bemisia tabaci* affects their densities during host development and  
495            environmental stress. PLoS One 9:e91802.
- 496    35.    Koga R, Tsuchida T, Fukatsu T. 2003. Changing partners in an obligate symbiosis:  
497            a facultative endosymbiont can compensate for loss of the essential endosymbiont  
498            Buchnera in an aphid. Proc Biol Sci 270:2543-2550.
- 499    36.    Sakurai M, Koga R, Tsuchida T, Meng XY, Fukatsu T. 2005. *Rickettsia* symbiont  
500            in the pea aphid *Acyrtosiphon pisum*: novel cellular tropism, effect on host fitness,  
501            and interaction with the essential symbiont Buchnera. Appl Environ Microbiol  
502            71:4069-4075.
- 503    37.    Simonet P, Duport G, Gaget K, Weiss-Gayet M, Colella S, Febvay G, Charles H,  
504            Vinuelas J, Heddi A, Calevro F. 2016. Direct flow cytometry measurements reveal  
505            a fine-tuning of symbiotic cell dynamics according to the host developmental  
506            needs in aphid symbiosis. Sci Rep 6:19967.
- 507    38.    Vigneron A, Masson F, Vallier A, Balmand S, Rey M, Vincent-Monegat C, Aksoy  
508            E, Aubailly-Giraud E, Zaidman-Remy A, Heddi A. 2014. Insects recycle  
509            endosymbionts when the benefit is over. Curr Biol 24:2267-2273.
- 510    39.    Luan JB, Shan HW, Isermann P, Huang JH, Lammerding J, Liu SS, Douglas AE.  
511            Cellular and molecular remodelling of a host cell for vertical transmission of  
512            bacterial symbionts. Proc R Soc B 283:20160580.

- 513 40. Ren FR, Sun X, Wang TY, Yao YL, Huang YZ, Zhang X, Luan JB. Biotin  
514 provisioning by horizontally transferred genes from bacteria confers animal fitness  
515 benefits. *ISME J* 14:2542-2553.
- 516 41. Gottlieb Y, Ghanim M, Chiel E, Gerling D, Portnoy V, Steinberg S, Tzuri G,  
517 Horowitz AR, Belausov E, Mozes-Daube N, Kontsedalov S, Gershon M, Gal S,  
518 Katzir N, Zchori-Fein E. 2006. Identification and localization of a *Rickettsia* sp. in  
519 *Bemisia tabaci* (Homoptera: Aleyrodidae). *Appl Environ Microbiol* 72:3646-3652.
- 520 42. Himler AG, Adachi-Hagimori T, Bergen JE, Kozuch A, Kelly SE, Tabashnik BE,  
521 Chiel E, Duckworth VE, Dennehy TJ, Zchori-Fein E, Hunter MS. 2011. Rapid  
522 spread of a bacterial symbiont in an invasive whitefly is driven by fitness benefits  
523 and female bias. *Science* 332:254-256.
- 524 43. Costa HS, Toscano NC, Henneberry TJ. 1996. Mycetocyte inclusion in the oocytes  
525 of *Bemisia argentifolii* (Homoptera: Aleyrodidae). *Ann Entomol Soc Am* 89:694–  
526 699.
- 527 44. Luan J, Sun X, Fei Z, Douglas AE. 2018. Maternal inheritance of a single somatic  
528 animal cell displayed by the bacteriocyte in the whitefly *Bemisia tabaci*. *Curr Biol*  
529 28:459-465 e3.
- 530 45. Tang XT, Cai L, Shen Y, Du YZ. 2018. Diversity and evolution of the  
531 endosymbionts of *Bemisia tabaci* in China. *PeerJ* 6:e5516.
- 532 46. Mound LA, Halsey SH. 1978. Whitefly of the world : a systematic catalogue of  
533 the Aleyrodidae (Homoptera) with host plant and natural enemy data. 340 pp. John  
534 Wiley and Sons, Chichester, UK.
- 535 47. Kapantaidaki DE, Ovčarenko I, Fytrou N, Knott KE, Bourtzis K, Tsagakarakou A.  
536 2015. Low levels of mitochondrial DNA and symbiont diversity in the worldwide

- 537 agricultural pest, the greenhouse whitefly *Trialeurodes vaporariorum* (Hemiptera:  
538 Aleyrodidae). *J Hered* 106:80-92.
- 539 48. Skaljac M, Zanic K, Hrcic S, Radonjic S, Perovic T, Ghanim M. 2013. Diversity  
540 and localization of bacterial symbionts in three whitefly species (Hemiptera:  
541 Aleyrodidae) from the east coast of the Adriatic Sea. *Bull Entomol Res* 103:48-59.
- 542 49. Santos-Garcia D, Juravel K, Freilich S, Zchori-Fein E, Latorre A, Moya A, Morin  
543 S, Silva FJ. 2018. To B or Not to B: Comparative Genomics Suggests  
544 *Arsenophonus* as a Source of B Vitamins in Whiteflies. *Front Microbiol* 9:2254.
- 545 50. Hardin G. 1960. The competitive exclusion principle. *Science* 131:1292-1297.
- 546 51. Chesson P. 2000. Mechanisms of maintenance of species diversity. *Annu. Rev.*  
547 *Ecol. Syst* 31:343-366.
- 548 52. Levine JM, HilleRisLambers J. 2009. The importance of niches for the  
549 maintenance of species diversity. *Nature* 461:254-257.
- 550 53. Xu XR, Li NN, Bao XY, Douglas AE, Luan JB. 2020. Patterns of host cell  
551 inheritance in the bacterial symbiosis of whiteflies. *Insect Sci* 27:938-946.
- 552 54. McCutcheon JP, Moran NA. 2007. Parallel genomic evolution and metabolic  
553 interdependence in an ancient symbiosis. *Proc Natl Acad Sci U S A* 104:19392-  
554 19397.
- 555 55. McCutcheon JP, Moran NA. 2010. Functional convergence in reduced genomes  
556 of bacterial symbionts spanning 200 My of evolution. *Genome Biol Evol* 2:708-  
557 718.
- 558 56. McCutcheon JP, McDonald BR, Moran NA. 2009. Convergent evolution of  
559 metabolic roles in bacterial co-symbionts of insects. *Proc Natl Acad Sci U S A*  
560 106:15394-15399.

- 561 57. Koga R, Moran NA. 2014. Swapping symbionts in spittlebugs: evolutionary  
562 replacement of a reduced genome symbiont. *ISME J* 8:1237-1246.
- 563 58. Szabo G, Schulz F, Manzano-Marin A, Toenshoff ER, Horn M. 2022.  
564 Evolutionarily recent dual obligatory symbiosis among adelgids indicates a  
565 transition between fungus- and insect-associated lifestyles. *ISME J* 16:247-256.
- 566 59. Meseguer AS, Manzano-Marín A, Coeur d'Acier A, Clamens AL, Godefroid M,  
567 Jousselin E. 2017. *Buchnera* has changed flatmate but the repeated replacement of  
568 co-obligate symbionts is not associated with the ecological expansions of their  
569 aphid hosts. *Mol Ecol* 26:2363–2378.
- 570 60. Weglarz KM, Havill NP, Burke GR, von Dohlen CD. 2018. Partnering With a  
571 Pest: Genomes of Hemlock Woolly Adelgid Symbionts Reveal Atypical  
572 Nutritional Provisioning Patterns in Dual-Obligate Bacteria. *Genome Biol Evol*  
573 10:1607-1621.
- 574 61. Luan JB, Chen W, Hasegawa DK, Simmons AM, Wintermantel WM, Ling KS,  
575 Fei Z, Liu SS, Douglas AE. 2015. Metabolic Coevolution in the Bacterial  
576 Symbiosis of Whiteflies and Related Plant Sap-Feeding Insects. *Genome Biol*  
577 7:2635-2647.
- 578 62. von Dohlen CD, Kohler S, Alsop ST, McManus WR. 2001. Mealybug beta-  
579 proteobacterial endosymbionts contain gamma-proteobacterial symbionts. *Nature*  
580 412:433–436.
- 581 63. Husnik F, Nikoh N, Koga R, Ross L, Duncan RP, Fujie M, Tanaka M, Satoh N,  
582 Bachtrog D, Wilson AC, von Dohlen CD, Fukatsu T, McCutcheon JP. 2013.  
583 Horizontal gene transfer from diverse bacteria to an insect genome enables a  
584 tripartite nested mealybug symbiosis. *Cell* 153:1567-1578.

- 585 64. Husnik F, McCutcheon JP. 2016. Repeated replacement of an intrabacterial  
586 symbiont in the tripartite nested mealybug symbiosis. *Proc Natl Acad Sci U S A*  
587 113:E5416- E5424.
- 588 65. Szabó G, Schulz F, Toenshoff ER, Volland JM, Finkel OM, Belkin S, Horn M.  
589 2017. Convergent patterns in the evolution of mealybug symbioses involving  
590 different intrabacterial symbionts. *ISME J* 11:715-726.
- 591 66. Santos-Garcia D, Vargas-Chavez C, Moya A, Latorre A, Silva FJ. 2015. Genome  
592 evolution in the primary endosymbiont of whiteflies sheds light on their  
593 divergence. *Genome Biol Evol* 7:873-888.
- 594 67. Mouton L, Henri H, Romba R, Belgaidi Z, Gnankiné O, Vavre F. 2022. Analyses  
595 of symbiotic bacterial communities in the plant pest *Bemisia tabaci* reveal high  
596 prevalence of *Candidatus Hemipteriphilus asiaticus* on the African continent. *Peer*  
597 *Community J* 2:e20.
- 598 68. Arasaki K, Toomre DK, Roy CR. 2012. The *Legionella pneumophila* effector  
599 DrrA is sufficient to stimulate SNARE-dependent membrane fusion. *Cell Host*  
600 *Microbe* 11:46-57.
- 601 69. Starr T, Child R, Wehrly TD, Hansen B, Hwang S, Lopez-Otin C, Virgin HW,  
602 Celli J. 2012. Selective subversion of autophagy complexes facilitates completion  
603 of the *Brucella* intracellular cycle. *Cell Host Microbe* 11:33-45.
- 604 70. Mehlitz A, Karunakaran K, Herweg JA, Krohne G, van de Linde S, Rieck E, Sauer  
605 M, Rudel T. 2014. The chlamydial organism *Simkania negevensis* forms ER  
606 vacuole contact sites and inhibits ER-stress. *Cell Microbiol*  
607 doi:10.1111/cmi.12278.
- 608 71. Escoll P, Mondino S, Rolando M, Buchrieser C. 2016. Targeting of host organelles

- 609 by pathogenic bacteria: a sophisticated subversion strategy. *Nat Rev Microbiol*  
610 14:5-19.
- 611 72. Newton IL, Savytskyy O, Sheehan KB. 2015. *Wolbachia* utilize host actin for  
612 efficient maternal transmission in *Drosophila melanogaster*. *PLoS Pathog*  
613 11:e1004798.
- 614 73. Sheehan KB, Martin M, Lesser CF, Isberg RR, Newton IL. 2016. Identification  
615 and Characterization of a Candidate *Wolbachia pipientis* Type IV Effector That  
616 Interacts with the Actin Cytoskeleton. *mBio* 7.
- 617 74. Simonet P, Gaget K, Balmand S, Ribeiro Lopes M, Parisot N, Buhler K, Duport  
618 G, Vulsteke V, Febvay G, Heddi A, Charles H, Callaerts P, Calevro F. 2018.  
619 Bacteriocyte cell death in the pea aphid/*Buchnera* symbiotic system. *Proc Natl*  
620 *Acad Sci U S A* 115:E1819-E1828.
- 621 75. Fattouh N, Cazevieille C, Landmann F. 2019. *Wolbachia* endosymbionts subvert  
622 the endoplasmic reticulum to acquire host membranes without triggering ER stress.  
623 *PLoS Negl Trop Dis* 13:e0007218.
- 624 76. Strunov A, Schmidt K, Kapun M, Miller WJ. 2022. Restriction of *Wolbachia*  
625 Bacteria in Early Embryogenesis of Neotropical *Drosophila* Species via  
626 Endoplasmic Reticulum-Mediated Autophagy. *mBio* 13:e0386321.
- 627 77. Fukatsu T. 1999. Acetone preservation: a practical technique for molecular  
628 analysis. *Mol. Ecol.* 8:1935–1945.
- 629 78. Tsuchida T, Koga R, Fujiwara A, Fukatsu T. 2014. Phenotypic Effect of  
630 "*Candidatus Rickettsiella viridis*," a Facultative Symbiont of the Pea Aphid  
631 (*Acyrtosiphon pisum*), and Its Interaction with a Coexisting Symbiont. *Appl*  
632 *Environ Microbiol* 80:525-533.

- 633 79. Koga R, Tsuchida T, Fukatsu T. 2009. Quenching autofluorescence of insect  
634 tissues for in situ detection of endosymbionts. *Appl Entomol Zool* 44:281-291.
- 635 80. De Clerck C, Fujiwara A, Joncour P, Leonard S, Felix ML, Francis F, Jijakli MH,  
636 Tsuchida T, Massart S. 2015. A metagenomic approach from aphid's hemolymph  
637 sheds light on the potential roles of co-existing endosymbionts. *Microbiome* 3:63.
- 638 81. Larsen P, Nielsen JL, Otzen D, Nielsen PH. 2008. Amyloid-like adhesins  
639 produced by floc-forming and filamentous bacteria in activated sludge. *Appl*  
640 *Environ Microbiol* 74:1517-1526.
- 641 82. Nishikori K, Morioka K, Kubo T, Morioka M. 2009. Age- and morph-dependent  
642 activation of the lysosomal system and *Buchnera* degradation in aphid  
643 endosymbiosis. *J Insect Physiol* 55:351-357.

644

645

646

## 647 **Figure Legends**

648 Figure 1. Localization of *Portiera* (red) and *Hamiltonella* (green) in bacteriocytes of  
649 *Bemisia tabaci*. (A–C) MEAM1: (A) bacteriocytes dissected from an adult female, (B) A  
650 3-day-old egg, and (C) a bacteriocyte dissected from a fourth-instar nymph. (D–F) MED  
651 Q1 strain: (D) Bacteriocytes of the fourth-instar nymph, (E) enlarged image of the regions  
652 indicated by a yellow square in (D), and (F) a bacteriocyte just before entering the egg in  
653 a teneral adult female. In (A–C, E, and F), orthogonal views of Z-stack images are shown;  
654 red and blue dashed lines indicate corresponding points in the orthogonal planes. In (B, D,  
655 E, and F), host nuclear DNA is visualized in blue. In (F), white dashed lines indicate the



656 outline of the egg. Bars, 20  $\mu\text{m}$ .

657

658 Figure 2. Transmission electron micrographs (TEM) of a bacteriocyte in *B. tabaci*

659 MEAM1. (A) Unstructured hypertrophic bacteria (*Portiera*) in the cytoplasm and rod-

660 shaped bacteria (*Hamiltonella*) around the nucleus of the bacteriocyte. (B) Enlarged image

661 of *Hamiltonella*. N, nucleus of a bacteriocyte; P, *Portiera*; H, *Hamiltonella*. Blue

662 arrowhead, ER-like structures surrounding *Hamiltonella*. Bars, 2  $\mu\text{m}$ .

663

664 Figure 3. Localization of *Hamiltonella* and the ER in a bacteriocyte of a young adult

665 female (1–5 d after eclosion) of MEAM1(A) and MED Q1(B). Orthogonal views of Z-

666 stack images are shown. Red and blue dashed lines indicate corresponding points in the

667 orthogonal planes. *Hamiltonella* and ER are shown in green and violet, respectively.

668 Panels in the bottom right corner of each figure are DAPI-stained images, showing nuclei

669 in the center of the bacteriocytes and *Portiera* and *Hamiltonella* around the nuclei. Yellow

670 dashed lines indicate the outline of the bacteriocytes. Bars, 20  $\mu\text{m}$ .

671

672 Figure 4. Localization of *Portiera* (red) and *Arsenophonus* (green) in a putative young

673 adult female *B. tabaci* Asia II 6. (A) Bacteriocytes in the abdomen. (B) developing egg

674 within the female. Orthogonal views of Z-stack images are shown. Red and blue dashed

675 lines indicate corresponding points in the orthogonal planes. Host nuclear DNA is

676 visualized in blue. In (B), yellow dashed lines indicate the outline of the egg. Bars, 50  $\mu\text{m}$ .

677

678 Figure 5. Localization of *Portiera* (red), *Arsenophonus* (green), and the ER (violet) in

679 bacteriocytes of *Trialeurodes vaporariorum*. (A) FISH image and (B)

680 immunohistochemistry combined with FISH (*B*). Orthogonal views of Z-stack images are  
681 shown. Red and blue dashed lines indicate corresponding points in the orthogonal planes.  
682 In (*B*), panel in the bottom right corner is DAPI-stained images and yellow dashed lines  
683 indicate the outline of a bacteriocyte. Bars, 20  $\mu\text{m}$ .

684

685 Figure 6. Phylogenetic relationships among whiteflies and their symbiotic system in  
686 bacteriocytes. Numbers at internal nodes indicate the divergence date (Mya: million years  
687 ago) estimated by Santos-Garcia *et al.* (66). The size of bacteriocytes is shown on the  
688 same scale.

689

690

### 691 **Supplemental Movie Legend**

692 Movie S1. Z-stack images of bacteriocytes harboring *Portiera* (red) and *Hamiltonella*  
693 (green) in *B. tabaci* MEAM1. Bar, 50  $\mu\text{m}$ . In total, 55 spatially consecutive images were  
694 collected by confocal microscopy (depth interval = 0.5  $\mu\text{m}$ ) and were processed using  
695 Zeiss LSM5 Pascal Image software. Nuclei in the center of bacteriocytes are not shown  
696 in the movie to clarify the localization patterns of the two symbionts.

697

698

### 699 **Supplemental Figure Legends**

700 Fig. S1. Population dynamics of symbionts in *B. tabaci* MEAM1. Bacterial titers of  
701 *Portiera* (*A*) and *Hamiltonella* (*B*) were measured by quantitative PCR in terms of 16S  
702 ribosomal RNA gene copies per insect. Each dot represents an individual; filled diamonds,

703 eggs and nymphs; open circles, adult females; gray triangles, adult males;  $n = 2$  for eggs,  
704  $n = 10$  for others. Asterisks indicate statistically significant differences ( $P < 0.001$ ),  
705 whereas “ns” indicates not significant ( $P > 0.05$ ). Note that symbiont titer in an egg was  
706 calculated by averaging acquired value of 10 individuals.

707

708 Fig. S2. *In vivo* localization of facultative symbionts around bacteriocytes in a young adult  
709 *B. tabaci*. Female (A) and male (B) within day 5 after eclosion in MEAM1. Female (C)  
710 and male (D) at day 1 after eclosion in MED Q1. Green indicates *Rickettsia* (A and B) or  
711 *Cardinium* (C and D). *Portiera* is shown in red. Host nuclear DNA is visualized in blue.  
712 Bars, 50  $\mu\text{m}$ .

713

714 Fig. S3. *In vivo* localization of *Portiera* (red) and *Hamiltonella* (green) in bacteriocytes of  
715 *B. tabaci* MEAM1. (A) Adult female at day 1 after eclosion, (B) adult male at day 1 after  
716 eclosion, (C) adult female at day 15 after eclosion, and (D) adult male at day 15 after  
717 eclosion. N, bacteriocyte nucleus; Bars, 50  $\mu\text{m}$ .

718

719 Fig S4. Detection of symbionts and the ER by FISH and immunohistochemistry. The  
720 bacteriocyte in a *B. tabaci* MEAM1 young adult female at day 1 to 5 after eclosion (A),  
721 old female at day 15 after eclosion (B), old male at day 15 after eclosion (C), MED Q1  
722 young adult female at day 1 to 5 after eclosion (D), putative young female of *B. tabaci*  
723 Asia II 6 (E), and *T. vaporariorum* young adult female at day 1 to 5 after eclosion (F).  
724 The images in A, D, and F correspond to Fig. 3A and B, and 5B, respectively. Panels for  
725 DNA (first column), symbiont (*Hamiltonella* or *Arsenophonus*) (second column), ER  
726 (third column), and merged image of the ER and symbiont (fourth column) are shown. In

727 (B, C, and F), panels for *Portiera* are added in the fifth column. DAPI-stained images in  
728 the first column show nuclei in the center of bacteriocytes, and *Portiera* and *Hamiltonella*  
729 around the nuclei. In merged panels, the ER is shown in violet and *Hamiltonella* or  
730 *Arsenophonus* is shown in green. Yellow dashed lines indicate outlines of the  
731 bacteriocytes. Bars, 20  $\mu$ m. Relatively weak signals of *Arsenophonus* and the ER in (E)  
732 can likely be explained by the use of acetone-preserved samples.

733

734 Fig. S5. *In vivo* localization of the ER and endosymbionts in living bacteriocytes of *B.*  
735 *tabaci* MED Q1. Orthogonal view of Z-stack images is shown. Red and blue dashed lines  
736 indicate corresponding points in the orthogonal planes. DNA and ER are shown in green  
737 and violet, respectively. In the cytoplasm, *Portiera* and *Hamiltonella* were detected as  
738 unstructured hypertrophic bacteria (weak green) and rod-shaped bacteria (strong green),  
739 respectively. N, nucleus of the bacteriocyte; P, *Portiera*; H, *Hamiltonella*. Bar, 20  $\mu$ m.

740

741 Fig. S6. Interdependent biosynthetic pathways of the essential amino acids in the co-  
742 obligate symbionts in whiteflies inferred from the published genomes. Lysine biosynthesis  
743 pathways in (A) *B. tabaci* MEAM1 (W. Chen, *et al.* BMC Biol. 14: 110, 2016) and MED  
744 Q1 (W. Xie, *et al.* BMC Genomics 19: 68, 2018). Genes of *Portiera*, *Hamiltonella*, and  
745 the host (candidate horizontally transferred genes) are indicated by magenta, green, and  
746 blue arrows, respectively. (B) Phenylalanine and tryptophan biosynthesis pathways in *T.*  
747 *vaporariorum* (D. Santos-Garcia, C. Vargas-Chavez, A. Moya, A. Latorre, F.J. Silva,  
748 Genome Biol. Evol. 7: 873–888, 2015; D. Santos-Garcia, K. Juravel, S. Freilich, E.  
749 Zchori-Fein, A. Latorre, A. Moya, S. Morin, F.J. Silva, Front. Microbiol. 9: 2254, 2018).  
750 Genes of *Portiera*, *Arsenophonus* and the host are indicated by magenta, green, and blue

751 arrows, respectively. Missing genes are indicated by dashed arrows. (C) Schematic of ER-  
752 mediated habitat segregation and putative nutrient flow in the co-obligate symbiotic  
753 system in whiteflies.

754

755 Fig. S7. Stages of *B. tabaci* MEAM1 development. Yellow cells in the egg or body are  
756 bacteriocytes. Numbers of days on the arrow indicate the approximate durations under  
757 laboratory conditions. Reproduction is frequently observed in young adults but rarely in  
758 senescent adults. Bars, 0.1 mm.

759

760

**Fig. 1**

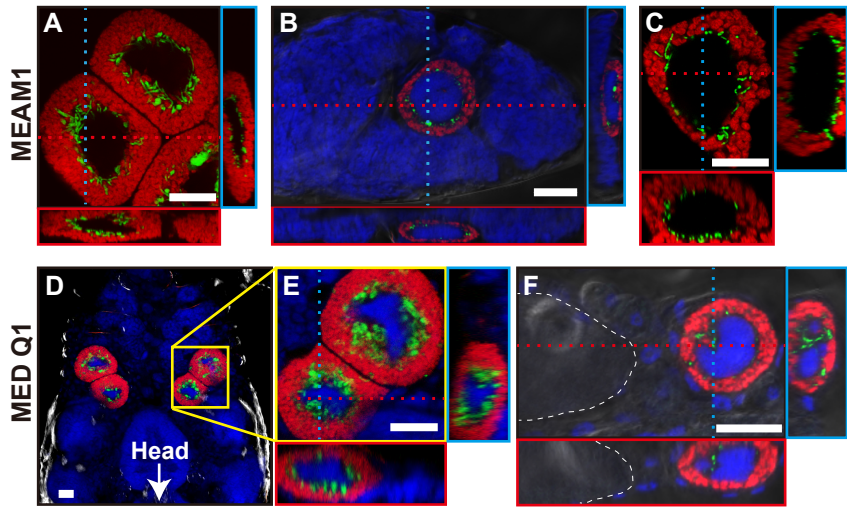

Figure 1. Localization of *Portiera* (red) and *Hamiltonella* (green) in bacteriocytes of *Bemisia tabaci*. (A–C) MEAM1: (A) bacteriocytes dissected from an adult female, (B) A 3-day-old egg, and (C) a bacteriocyte dissected from a fourth-instar nymph. (D–F) MED Q1 strain: (D) Bacteriocytes of the fourth-instar nymph, (E) enlarged image of the regions indicated by a yellow square in (D), and (F) a bacteriocyte just before entering the egg in a teneral adult female. In (A–C, E, and F), orthogonal views of Z-stack images are shown; red and blue dashed lines indicate corresponding points in the orthogonal planes. In (B, D, E, and F), host nuclear DNA is visualized in blue. In (F), white dashed lines indicate the outline of the egg. Bars, 20  $\mu$ m.

**Fig. 2**

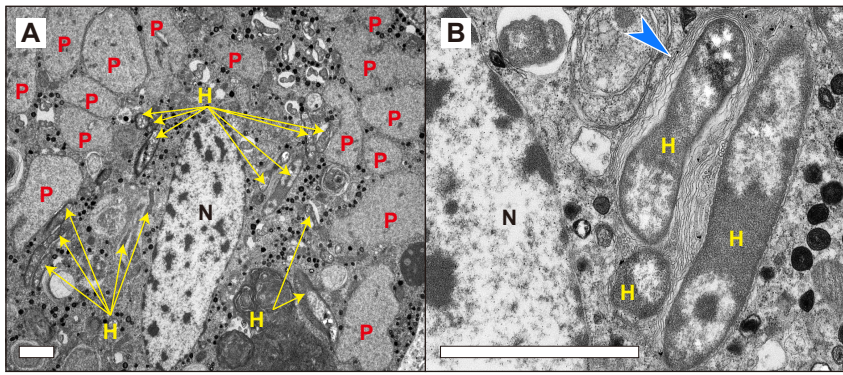

Figure 2. Transmission electron micrographs (TEM) of a bacteriocyte in *B. tabaci* MEAM1. (A) Unstructured hypertrophic bacteria (*Portiera*) in the cytoplasm and rod-shaped bacteria (*Hamiltonella*) around the nucleus of the bacteriocyte. (B) Enlarged image of *Hamiltonella*. N, nucleus of a bacteriocyte; P, *Portiera*; H, *Hamiltonella*. Blue arrowhead, ER-like structures surrounding *Hamiltonella*. Bars, 2 μm.

**Fig. 3**

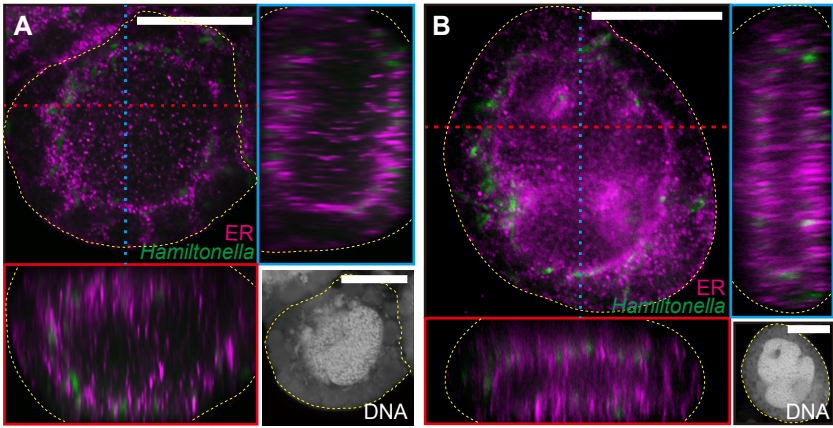

Figure 3. Localization of *Hamiltonella* and the ER in a bacteriocyte of a young adult female (1–5 d after eclosion) of MEAM1(A) and MED Q1(B). Orthogonal views of Z-stack images are shown. Red and blue dashed lines indicate corresponding points in the orthogonal planes. *Hamiltonella* and ER are shown in green and violet, respectively. Panels in the bottom right corner of each figure are DAPI-stained images, showing nuclei in the center of the bacteriocytes and *Portiera* and *Hamiltonella* around the nuclei. Yellow dashed lines indicate the outline of the bacteriocytes. Bars, 20  $\mu\text{m}$ .



Fig. 4

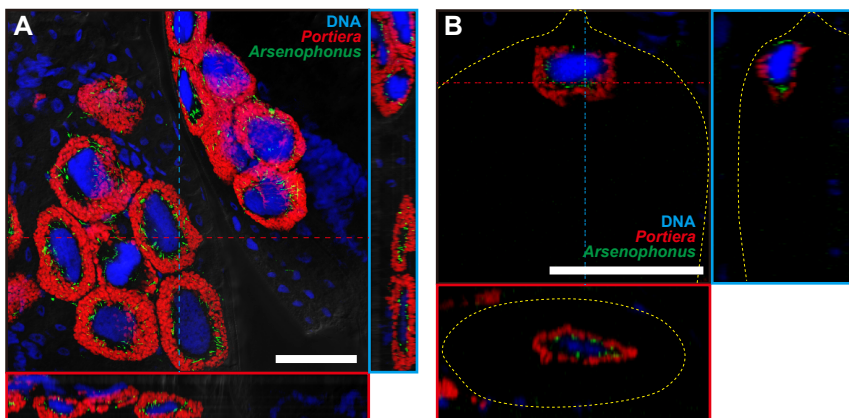

Figure 4. Localization of *Portiera* (red) and *Arsenophonus* (green) in a putative young adult female *B. tabaci* Asia II 6. (A) Bacteriocytes in the abdomen. (B) developing egg within the female. Orthogonal views of Z-stack images are shown. Red and blue dashed lines indicate corresponding points in the orthogonal planes. Host nuclear DNA is visualized in blue. In (B), yellow dashed lines indicate the outline of the egg. Bars, 50 μm.

Fig. 5

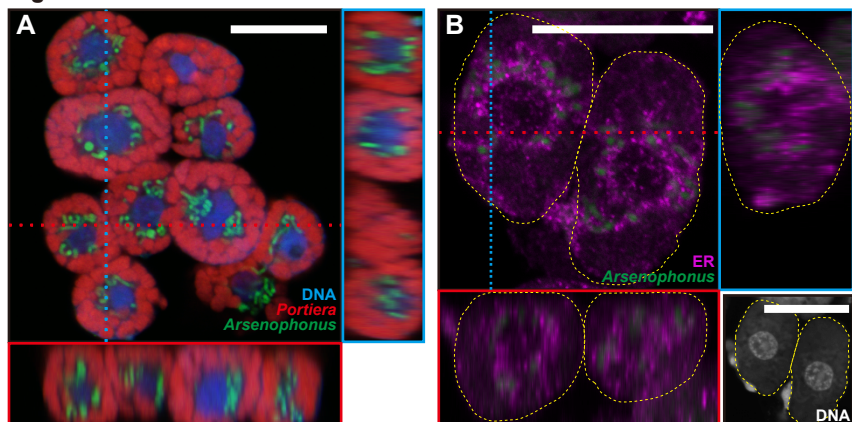

Figure 5. Localization of *Portiera* (red), *Arsenophonus* (green), and the ER (violet) in bacteriocytes of *Trialeurodes vaporariorum*. (A) FISH image and (B) immunohistochemistry combined with FISH (B). Orthogonal views of Z-stack images are shown. Red and blue dashed lines indicate corresponding points in the orthogonal planes. In (B), panel in the bottom right corner is DAPI-stained images and yellow dashed lines indicate the outline of a bacteriocyte. Bars, 20  $\mu\text{m}$ .

Fig. 6

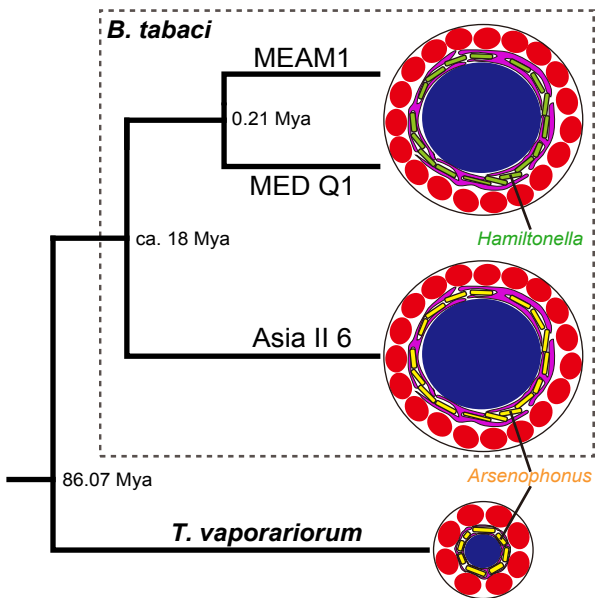

Figure 6. Phylogenetic relationships among whiteflies and their symbiotic system in bacteriocytes. Numbers at internal nodes indicate the divergence date (Mya: million years ago) estimated by Santos-Garcia *et al.* (64). The size of bacteriocytes is shown on the same scale.
